# Supplementary material for: Whole Transcriptome Sequencing Reveals Cancer-Related, Prognostically Significant Transcripts and Tumor-Infiltrating Immunocytes in Mantle Cell Lymphoma
Source: Cells. 2022 Oct 27;11(21):3394. doi: 10.3390/cells11213394 (PMC9654955; doi:10.3390/cells11213394)
Supplement: Supplementary file 1 [file cells-11-03394-s001.zip › 28.10.2022-cells-1956495-SI Tables-MCL WTS-MDPI_Cells.pdf]

**Table S1.** The summary of demographic and clinicopathological characteristics of the MCL cases.

| Overall (N=31)           |                   |
|--------------------------|-------------------|
| <b>Sex</b>               |                   |
| Female                   | 5 (16.1%)         |
| Male                     | 26 (83.9%)        |
| <b>Age (years)</b>       |                   |
| Mean (SD)                | 63.0 (11.4)       |
| Median [Min, Max]        | 63.0 [39.0, 81.0] |
| <b>Stage</b>             |                   |
| II                       | 1 (3.2%)          |
| III                      | 3 (9.7%)          |
| IV                       | 25 (80.6%)        |
| NA                       | 2 (6.5%)          |
| <b>Ki67 Index (%)</b>    |                   |
| Mean (SD)                | 37.4 (18.5)       |
| Median [Min, Max]        | 30.0 [10.0, 75.0] |
| NA                       | 2 (6.5%)          |
| <b>LDH Level (U/l)</b>   |                   |
| Mean (SD)                | 222 (67.5)        |
| Median [Min, Max]        | 207 [107, 386]    |
| NA                       | 4 (12.9%)         |
| <b>B symptoms</b>        |                   |
| Absent                   | 20 (64.5%)        |
| Present                  | 9 (29.0%)         |
| NA                       | 2 (6.5%)          |
| <b>Initial Treatment</b> |                   |
| R-CHOP                   | 16 (51.6%)        |
| R-CHOP + R-DHAP          | 11 (35.5%)        |
| R-CHOP + Radiotherapy    | 1 (3.2%)          |
| NA                       | 3 (9.7%)          |
| <b>MIPI</b>              |                   |
| High risk                | 27 (87.1%)        |
| Intermediate risk        | 1 (3.2%)          |
| Low risk                 | 1 (3.2%)          |
| NA                       | 2 (6.5%)          |

LDH: Lactate dehydrogenase

R-CHOP: Rituximab- Cyclophosphamide, Hydroxydaunomycin, Oncovin, Prednisone

R-DHAP: Rituximab- Dexamethasone, Cytarabine, Cisplatin

MIPI: Mantle Cell Lymphoma International Prognostic Index

NA: Not available

**Table S2.** RIN and DV200 scores of MCL and control samples.

| Case no   | WTS sample code | RIN score | DV200 (%) score | Genome sequencing company |
|-----------|-----------------|-----------|-----------------|---------------------------|
| Case-01   | Case-01         | 2.8       | -               | Novogene                  |
| Case-02   | Case-02         | 3.2       | -               | Novogene                  |
| Case-03   | Case-03         | 2.3       | 70.34           | Macrogen                  |
| Case-04-1 | Case-04-1       | 2.4       | -               | Novogene                  |
| Case-04-2 | Case-04-2       | 2.3       | -               | Novogene                  |
| Case-05   | Case-05         | 3.3       | 80.73           | Macrogen                  |
| Case-06   | Case-06         | 2.4       | -               | Novogene                  |
| Case-07   | Case-07         | 2.7       | 75.85           | Macrogen                  |
| Case-08   | Case-08         | 2.2       | 71.44           | Macrogen                  |
| Case-09   | Case-09         | 3.2       | 71.31           | Macrogen                  |
| Case-10   | Case-10         | 1.9       | 78.67           | Macrogen                  |
| Case-11   | Case-11         | 3.1       | 72.71           | Macrogen                  |
| Case-12   | Case-12         | 2.3       | -               | Novogene                  |
| Case-13   | Case-13         | 2.3       | -               | Novogene                  |
| Case-14   | Case-14         | 2.3       | -               | Novogene                  |
| Case-15   | Case-15         | 1.8       | -               | Novogene                  |
| Case-16   | Case-16         | 2.3       | 71.27           | Macrogen                  |
| Case-17   | Case-17         | 1.7       | -               | Novogene                  |
| Case-18   | Case-18         | 2.1       | 58.26           | Macrogen                  |
| Case-19   | Case-19         | 2.4       | -               | Novogene                  |
| Case-20   | Case-20         | 2.3       | -               | Novogene                  |
| Case-21   | Case-21         | 2.4       | -               | Novogene                  |
| Case-22   | Case-22         | 1.9       | 58.34           | Macrogen                  |
| Case-23   | Case-23         | 2.4       | -               | Novogene                  |
| Case-24   | Case-24         | 2.5       | -               | Novogene                  |
| Case-25   | Case-25         | 2.2       | -               | Novogene                  |
| Case-26   | Case-26         | 2.6       | -               | Novogene                  |
| Case-27   | Case-27         | 2.3       | -               | Novogene                  |
| Case-28   | Case-28         | 2.3       | -               | Novogene                  |
| Case-29   | Case-29         | 2.5       | -               | Novogene                  |
| Case-30   | Case-30         | 2.7       | -               | Novogene                  |
| Case-31   | Case-31         | 2.3       | -               | Novogene                  |
| NBC-01    | Control-01      | 7.5       | -               | Novogene                  |
| NBC-02    | Control-02      | 8.8       | -               | Novogene                  |
| NBC-03    |                 | 5.9       | -               | Novogene                  |
| NBC-04    |                 | 4.6       | -               | Novogene                  |
| NBC-05    |                 | 2.7       | -               | Novogene                  |
| MBC-01    | Control-03      | 8.9       | -               | Novogene                  |
| MBC-02    |                 | 7.7       | -               | Novogene                  |
| MBC-03    |                 | 7.9       | -               | Novogene                  |
| CC-01     | Control-04      | 8.2       | -               | Novogene                  |
| CC-02     | Control-05      | 8.7       | -               | Novogene                  |
| CC-03     |                 | 7         | -               | Novogene                  |
| CC-04     |                 | 5.8       | -               | Novogene                  |

∴ RNA samples **without** DV200 (%) score.

**Table S3.** Control group samples used in WTS and qRT-PCR validation.

| Reactive tonsil code* | WTS sample code | Control group samples | WTS usage (Pooled/non-pooled) | qRT-PCR Validation (SNHG5 or CCND1) |
|-----------------------|-----------------|-----------------------|-------------------------------|-------------------------------------|
| RTT-01                | Control-01      | NBC-01                | Non-pooled                    | SNHG5                               |
| RTT-02                | Control-02      | NBC-02                | Pooled                        | SNHG5                               |
| RTT-03                |                 | NBC-03                |                               | -                                   |
| RTT-04                |                 | NBC-04                |                               | CCND1                               |
| RTT-05                |                 | NBC-05                |                               | CCND1                               |
| RTT-06                | Control-03      | MBC-01                | Pooled                        | SNHG5                               |
| RTT-01                |                 | MBC-02                |                               | CCND1                               |
| RTT-07                |                 | MBC-03                |                               | -                                   |
| RTT-01                | Control-04      | CC-01                 | Non-pooled                    | -                                   |
| RTT-03                | Control-05      | CC-02                 | Pooled                        | SNHG5                               |
| RTT-04                |                 | CC-03                 |                               | CCND1                               |
| RTT-05                |                 | CC-04                 |                               | SNHG5, CCND1                        |
| RTT-03                | Not used in WTS | MBC-04                | Not used                      | CCND1                               |

-: Control samples **not used** for the **qRT-PCR validation**.

**NBC:** Reactive tonsil naive B cells

**MBC:** Reactive tonsil memory B cells

**CC:** Reactive tonsil centrocytes

**RTT:** Reactive tonsil tissue

\*Each of the reactive tonsil tissues was obtained from a different individual.

**Table S4.** Basic statistics of whole transcriptome sequencing.

| Case number | Sample type                           | Total raw read number | Q20 (%) | Q30 (%) | GC (%) | Genome sequencing company |
|-------------|---------------------------------------|-----------------------|---------|---------|--------|---------------------------|
| Case-01     | FFPE tRNA                             | 90831962              | 97.45   | 93.86   | 37.26  | Novogene                  |
| Case-02     | FFPE tRNA                             | 117591776             | 97.56   | 94.02   | 38.75  | Novogene                  |
| Case-03     | FFPE tRNA                             | 82136132              | 98.704  | 96.398  | 43.442 | Macrogen                  |
| Case-04-1   | FFPE tRNA                             | 104570182             | 96.65   | 91.20   | 43.20  | Novogene                  |
| Case-04-2   | FFPE tRNA                             | 96138846              | 97.47   | 93.83   | 40.14  | Novogene                  |
| Case-05     | FFPE tRNA                             | 75192548              | 98.576  | 96.125  | 42.894 | Macrogen                  |
| Case-06     | FFPE tRNA                             | 85592928              | 97.65   | 94.22   | 39.32  | Novogene                  |
| Case-07     | FFPE tRNA                             | 70226712              | 98.628  | 96.217  | 43.538 | Macrogen                  |
| Case-08     | FFPE tRNA                             | 69978056              | 98.575  | 96.132  | 42.519 | Macrogen                  |
| Case-09     | FFPE tRNA                             | 74057924              | 98.628  | 96.165  | 45.730 | Macrogen                  |
| Case-10     | FFPE tRNA                             | 56753632              | 98.59   | 96.25   | 44.27  | Macrogen                  |
| Case-11     | FFPE tRNA                             | 72244348              | 98.669  | 96.318  | 43.420 | Macrogen                  |
| Case-12     | FFPE tRNA                             | 100083980             | 96.72   | 91.53   | 44.74  | Novogene                  |
| Case-13     | FFPE tRNA                             | 106195216             | 96.73   | 91.43   | 43.37  | Novogene                  |
| Case-14     | FFPE tRNA                             | 111891342             | 97.31   | 92.7    | 55.7   | Novogene                  |
| Case-15     | FFPE tRNA                             | 108799404             | 97.25   | 92.56   | 54.71  | Novogene                  |
| Case-16     | FFPE tRNA                             | 63634496              | 98.86   | 96.87   | 42.98  | Macrogen                  |
| Case-17     | FFPE tRNA                             | 100157812             | 96.52   | 91.11   | 45.82  | Novogene                  |
| Case-18     | FFPE tRNA                             | 75514478              | 98.673  | 96.051  | 56.539 | Macrogen                  |
| Case-19     | FFPE tRNA                             | 97789426              | 96.79   | 91.6    | 43.69  | Novogene                  |
| Case-20     | FFPE tRNA                             | 108569252             | 96.52   | 91.2    | 46.2   | Novogene                  |
| Case-21     | FFPE tRNA                             | 106357030             | 96.56   | 91.32   | 45.03  | Novogene                  |
| Case-22     | FFPE tRNA                             | 68515654              | 98.643  | 96.234  | 44.568 | Macrogen                  |
| Case-23     | FFPE tRNA                             | 103598684             | 96.43   | 90.81   | 42.42  | Novogene                  |
| Case-24     | FFPE tRNA                             | 112811778             | 97.31   | 93.4    | 46.84  | Novogene                  |
| Case-25     | FFPE tRNA                             | 106341400             | 96.68   | 91.39   | 43.39  | Novogene                  |
| Case-26     | FFPE tRNA                             | 92950872              | 97.39   | 93.65   | 41.43  | Novogene                  |
| Case-27     | FFPE tRNA                             | 88991804              | 97.48   | 93.8    | 41.97  | Novogene                  |
| Case-28     | FFPE tRNA                             | 101516630             | 95.97   | 89.94   | 42.43  | Novogene                  |
| Case-29     | FFPE tRNA                             | 103480146             | 96.56   | 91.13   | 42.7   | Novogene                  |
| Case-30     | FFPE tRNA                             | 104468972             | 96.59   | 91.19   | 43.13  | Novogene                  |
| Case-31     | FFPE tRNA                             | 81421512              | 97.33   | 93.53   | 40.75  | Novogene                  |
| Control-01  | NBC RNA                               | 101290336             | 97.13   | 92.95   | 44.98  | Novogene                  |
| Control-02  | NBC RNA<br>(4 control samples pooled) | 104674474             | 97.11   | 92.78   | 51.35  | Novogene                  |
| Control-03  | MBC RNA<br>(3 control samples pooled) | 105511034             | 96.84   | 92.48   | 56.62  | Novogene                  |
| Control-04  | CC RNA                                | 103685958             | 97.31   | 93.27   | 46.25  | Novogene                  |
| Control-05  | CC RNA<br>(3 control samples pooled)  | 108084430             | 97.19   | 92.87   | 50.58  | Novogene                  |

FFPE tRNA: Formalin-fixed paraffin-embedded tumor tissue RNA

NBC RNA: Naive B cells RNA

MBC RNA: Memory B cells RNA

CC RNA: Centrocyles RNA

GC(%): GC content.

Q20(%): Ratio of bases that have phred quality score of over 20.

Q30(%): Ratio of bases that have phred quality score of over 30.
